# Supplementary material for: Prdm9 Polymorphism Unveils Mouse Evolutionary Tracks
Source: PubMed Central journal article supplement — DNA Res. 2014 Jan 20;21(3):315–26. doi: 10.1093/dnares/dst059 (PMC4060951; doi:10.1093/dnares/dst059), 2014-01-20
Supplement: supp_dst059_dst059supp.pdf [file supp_dst059_dst059supp.pdf]

## SUPPLEMENTARY INFORMATION

### ***Prdm9* polymorphism unveils mouse evolutionary tracks**

Hiromitsu Kono, Masaru Tamura, Naoki Osada, Hitoshi Suzuki, Kuniya Abe, Kazuo Moriwaki, Kunihiro Ohta and Toshihiko Shiroishi

|              |                                                                       |      |
|--------------|-----------------------------------------------------------------------|------|
| C57BL/10J    | ATGTCCTGCACCATGAACACCAACAAGCTGGAAGAAAATAGTCCTGAAGAAGATACAGGG          | 60   |
| CHD/Ms       | ATGTCCTGCACCATGAACACCAACAAGCTGGAAGAAAATAGTCCTGAAGAAGATACAGGG          | 60   |
| B10.D2-TCH/+ | ATGTCCTGCACCATGAACACCAACAAGCTGGAAGAAAATAGTCCTGAAGAAGATACAGGG          | 60   |
|              | *****                                                                 |      |
| C57BL/10J    | AAATTCGAGTGGAAACCCAAGGTCAAAGATGAATTCAAAGACATTTCCATATACTTCTCC          | 120  |
| CHD/Ms       | AAATTCGAGTGGAAACCCAAGGTCAAAGATGAATTCAAAGACATTTCCATATACTTCTCC          | 120  |
| B10.D2-TCH/+ | AAATTCGAGTGGAAACCCAAGGTCAAAGATGAATTCAAAGACATTTCCATATACTTCTCC          | 120  |
|              | *****                                                                 |      |
| C57BL/10J    | AAAGAAGAATGGGCAGAGATGGGAGAGTGGGAGAAAATTCGCTATAGAAATGTGAAAAG           | 180  |
| CHD/Ms       | AAAGAAGAATGGGCAGAGATGGGAGAGTGGGAGAAAATTCGCTATAGAAATGTGAAAAG           | 180  |
| B10.D2-TCH/+ | AAAGAAGAATGGGCAGAGATGGGAAAGTGGGAGAAAATTCGCTATAGAAATGTGAAAAG           | 180  |
|              | *****                                                                 |      |
|              | ■                                                                     |      |
|              | ■                                                                     |      |
| C57BL/10J    | AAGGAATCATCTAGAATGCCATTTAGTGGTGAATCTAATGTGAAGGAAGGGTCTGGAATA          | 420  |
| CHD/Ms       | AAGGAATCATCTAGAATGCCATTTAGTGGTGAATCTAATGTGAAGGAAGGGTCTGGAATA          | 420  |
| B10.D2-TCH/+ | AAGGAATCATCTAGAATGCCATTTAGTGGTGAATCTAATGTGAAGGAAGGGTCTGGAATA          | 420  |
|              | *****                                                                 |      |
| C57BL/10J    | GAAAATTTGCTGAATACAAGTGGCTCAGAACACGTCAGAAACCAGTGTCTCCCTTGAA            | 480  |
| CHD/Ms       | GAAAATTTGCTGAATACAAGTGGCTCAGAACACGTCAGAAACCAGTGTCTCCCTTGAA            | 480  |
| B10.D2-TCH/+ | GAAAATTTGCTGAATACAAGTGGCTCAGAACACGTCAGAAACCAGTGTCTCCCTTGAA            | 480  |
|              | *****                                                                 |      |
| C57BL/10J    | GAAGGAAATACCTCTGGACAGCAC---TCTGGGAAAAAAGTGA-----AACTTAGGAAA           | 531  |
| CHD/Ms       | GAAGGAAATACCTCTGGACAGCAC---TCTGGGAAAAAAGTGA <b>ETAAGA</b> AACTTAGGAAA | 537  |
| B10.D2-TCH/+ | GAAGGAAATACCTCTGGACAGCAC <b>CAC</b> CTGGGAAAAAAGTGA-----AACTTAGGAAA   | 534  |
|              | *****                                                                 |      |
| C57BL/10J    | AAGAACGTTGAAGTGAATAATGTACAGGCTGCGAGAGAGAAAGGGCCTTGCCATGAGGAG          | 591  |
| CHD/Ms       | AAGAACGTTGAAGTGAATAATGTACAGGCTGCGAGAGAGAAAGGGCCTTGCCATGAGGAG          | 597  |
| B10.D2-TCH/+ | AAGAACGTTGAAGTGAATAATGTACAGGCTGCGAGAGAGAAAGGGCCTTGCCATGAGGAG          | 594  |
|              | *****                                                                 |      |
|              | ■                                                                     |      |
|              | ■                                                                     |      |
| C57BL/10J    | CAAATGAGATCTGAGGAAAGTAAGAGAACTGTGGAAGAGCTCAGAACAGGCCAGACAACA          | 1491 |
| CHD/Ms       | CAAATGAGATCTGAGGAAAGTAAGAGAACTGTGGAAGAGCTCAGAACAGGCCAGACAACA          | 1497 |
| B10.D2-TCH/+ | CAAATGAGATCTGAGGAAAGTAAGAGAACTGTGGAAGAGCTCAGAACAGGCCAGACAACA          | 1494 |
|              | *****                                                                 |      |
| C57BL/10J    | AATACAGAGGACACAGTCAAATCATTTATTGCATCAGAAATCTCAAGTATTGAAAGACAA          | 1551 |
| CHD/Ms       | AATACAGAGGACACAGTCAAATCATTTATTGCATCAGAAATCTCAAGTATTGAAAGACAA          | 1557 |
| B10.D2-TCH/+ | AATACAGAGGACACAGTCAAATCATTTATTGCATCAGAAATCTCAAGTATTGAA <b>-----</b>   | 1548 |
|              | *****                                                                 |      |
| C57BL/10J    | TGTGGGCAATATTTTCAGTGATAAGTCAAATGTCAATGAGCACCAGAAGACACACACAGGG         | 1611 |
| CHD/Ms       | TGTGGGCAATATTTTCAGTGATAAGTCAAATGTCAATGAGCACCAGAAGACACACACAGGG         | 1617 |
| B10.D2-TCH/+ | <b>---</b> GGGCAATATTTTCAGTGATAAGTCAAATGTCAATGAGCACCAGAAGACACACACAGGG | 1605 |
|              | *****                                                                 |      |
| C57BL/10J    | GAGAAGCCCTATGTTTGCAGGGAGTGTGGCGGGGCTTTACACAGAAGTCAACCTCATC            | 1671 |
| CHD/Ms       | GAGAAGCCCTATGTTTGCAGGGAGTGTGGCGGGGCTTTACACAGAAGTCAACCTCATC            | 1677 |
| B10.D2-TCH/+ | GAGAAGCCCTATGTTTGCAGGGAGTGTGGCGGGGCTTTACAGCGAAGTCAAGCTCCTC            | 1665 |
|              | *****                                                                 |      |
| C57BL/10J    | CAGCACCAGAGGACACACACAGGGGAGAAGCCCTATGTTTGCAGGGAGTGTGGCGGGGC           | 1731 |
| CHD/Ms       | AAGCACCAGAGGACACACACAGGGGAGAAGCCCTATGTTTGCAGGGAGTGTGGCGGGGC           | 1737 |
| B10.D2-TCH/+ | CAGCACCAGAGGACACACACAGGGGAGAAGCCCTATGTTTGCAGGGGAGTGTGGCGGGGC          | 1725 |
|              | *****                                                                 |      |

### Supplementary Figure S1. *Prdm9* cDNA sequences from three inbred mouse strains.

*Prdm9* cDNA sequences of three inbred strains, C57BL/10J, B10.D2-TCH/+ and CHD/Ms, are aligned. Insertion and deletion of B10.D2-TCH/+ and CHD/Ms for the C57BL/10J reference sequence and C57BL/10J sequence are indicated by an orange box. The ZFA region is indicated by a blue box. B10.D2-TCH/+ has a single insertion and deletion. CHD/Ms has a single deletion.

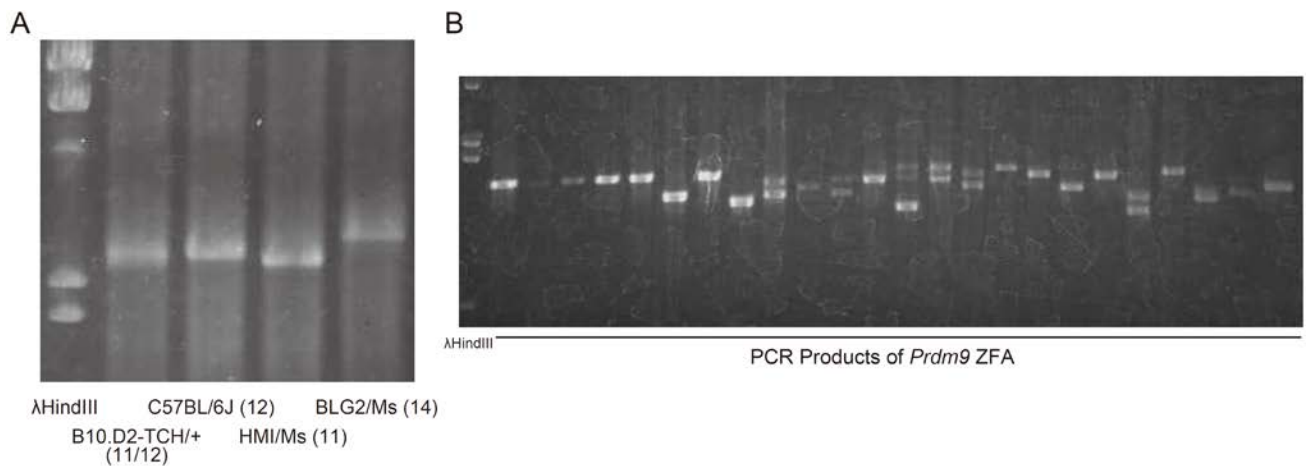

**Supplementary Figure S2. Agarose gel electrophoresis separation of PCR-amplified products.**

(A) PCR products of *Prdm9* cDNAs from representative strains. The strain names are shown under each lane. The number of ZF repeats in each *Prdm9* allele is shown in brackets. The B10.D2-TCH/+ stock is heterozygous for *Prdm9*.

(B) PCR products of *Prdm9* ZFA from representative wild-derived strains.

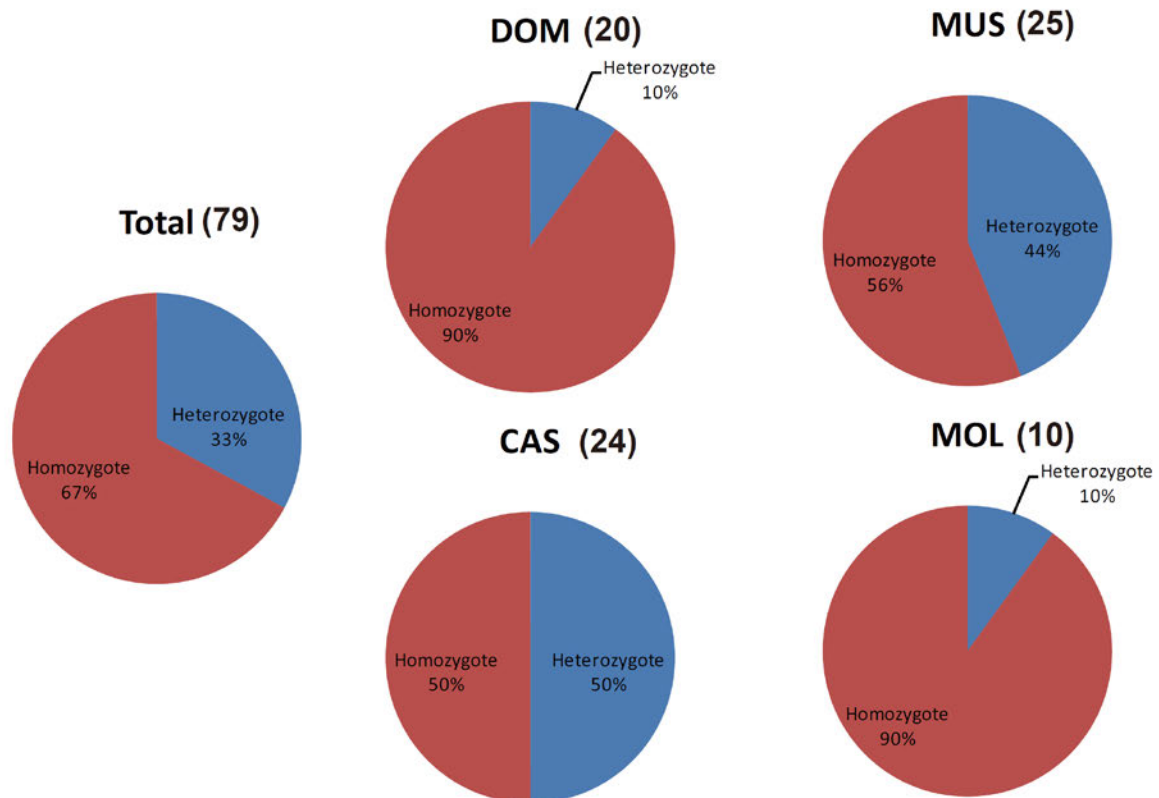

**Supplementary Figure S3. Frequency of mice with heterozygous *Prdm9* alleles.**

We calculated the frequency of mice with heterozygous *Prdm9* alleles using wild-captured samples. The number in parenthesis at the right side of the subspecies abbreviation is the sample number used in the calculations.

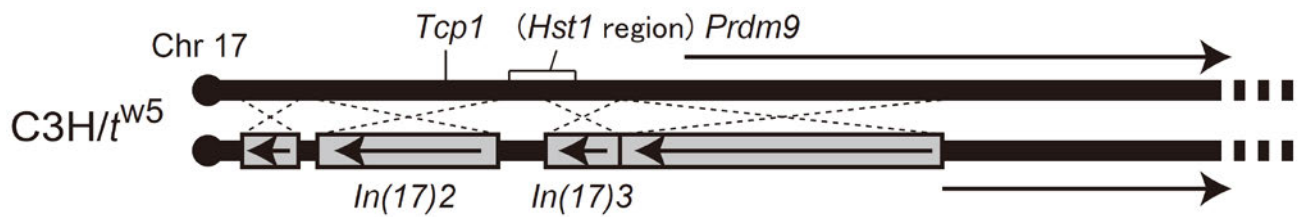

**Supplementary Figure S4. Diagram of mouse *t*-haplotype chromosome.**

The mouse *t*-haplotype chromosome has four inversions in chromosome 17 relative to a wild-type chromosome. The *Prdm9* (*Hst1*) locus is linked to the third inversion, *In(17)3*. *Tcp1* is located in the second inversion, *In(17)2*.

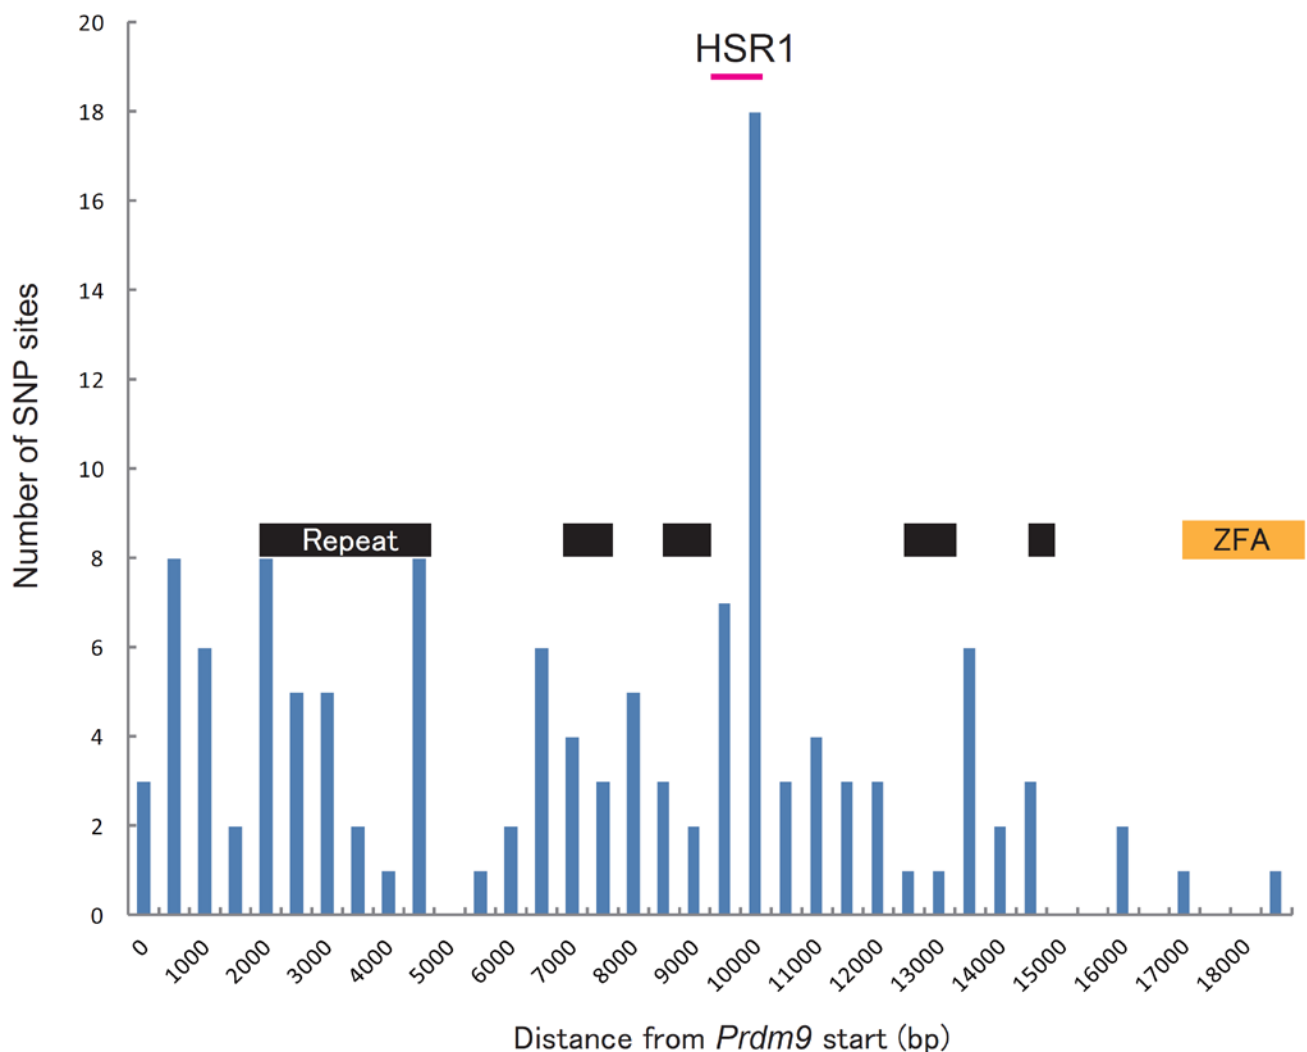

**Supplementary Figure S5. Highly variable regions in the *Prdm9* genomic sequence.**

*Prdm9* genomic sequences of three inbred strains, C57BL/6J, CAST/EiJ and PWK/PhJ, were obtained from the Jackson Laboratory polymorphism database (<http://phenome.jax.org/>). The number of SNPs among these three strains were counted for every 500 bp bin, starting from the transcription start site of *Prdm9*. The most variable region resides in the intron near exon 10. A 750 bp stretch (after removing repeat sequences), referred to as High SNP Region 1 (HSR1), was used for phylogenetic analysis.

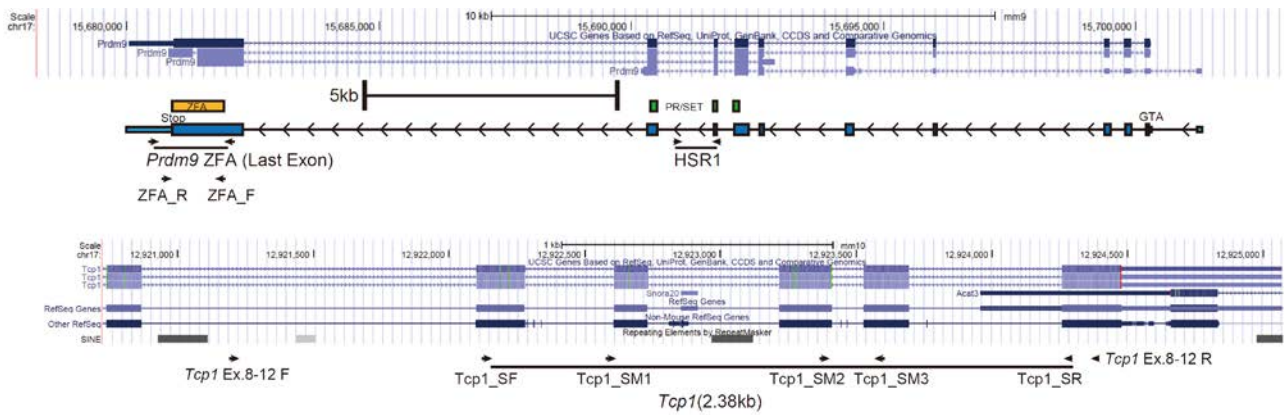

### Supplementary Figure S6. Location on the genome of PCR and sequencing primers used in this study.

Genomic locations of the primers used in this experiment are shown. The genomic map was obtained from the UCSC Genome Browser (<http://genome.ucsc.edu/cgi-bin/hgGateway>).

### Supplementary Table S1. Inbred strains used for sequencing of *Prdm9* cDNA

| Strain       | Origin                  | Locality of collection |           | ZFA variant type | Remarks                              |
|--------------|-------------------------|------------------------|-----------|------------------|--------------------------------------|
| MSM/Ms       | <i>M. m. molossinus</i> | Mishima                | Japan     | Ma5              |                                      |
| JF1/Ms       | <i>M. m. molossinus</i> |                        | (Denmark) | Ma5              | Japanese fancy mouse                 |
| R209-wm7     | <i>M. m. castaneus</i>  | Sasaguri               | Japan     | Ca2              |                                      |
| C57BL/10J    | <i>M. m. domesticus</i> |                        |           | Da2              |                                      |
| BFM/2Ms      | <i>M. m. domesticus</i> | Montpellier            | France    | Dc1              |                                      |
| PGN2/Ms      | <i>M. m. domesticus</i> | Pigion                 | Canada    | Dc2              |                                      |
| HMI/Ms       | <i>M. m. castaneus</i>  | Hemei                  | Taiwan    | Ca2              |                                      |
| B10.D2-TCH/+ | <i>M. m. castaneus</i>  | Taichung               | Taiwan    | Da2 / <i>t</i>   | Heterozygous for <i>t</i> -haplotype |
| NJL/Ms       | <i>M. m. musculus</i>   | Northern Jutland       | Denmark   | Ma7              |                                      |
| BLG2/Ms      | <i>M. m. musculus</i>   | Toshevo                | Bulgaria  | Ma12             |                                      |
| CHD/Ms       | <i>M. m. musculus</i>   | Chengdu                | China     | Ma12             |                                      |
| SPR2         | <i>M. spretus</i>       |                        |           | SPR2             | Neighboring species                  |

**Supplementary Table S2. Samples used for sequencing of the ZFA**

| Sample ID (Strain) | Territory (origin)      | Locality of collection             |            | ZFA variant Type | Remarks                    |
|--------------------|-------------------------|------------------------------------|------------|------------------|----------------------------|
| MG201              | <i>M. m. molossinus</i> | Niigata                            | Japan      | Ma5              | Wild-captured              |
| MG270              | <i>M. m. molossinus</i> | Morioka                            | Japan      | Ma5              | Wild-captured              |
| MG296              | <i>M. m. molossinus</i> | Teine, Sapporo                     | Japan      | Ma5              | Wild-captured              |
| MG495              | <i>M. m. molossinus</i> | Hachijo Is.                        | Japan      | Ma5              | Wild-captured              |
| MG5013             | <i>M. m. molossinus</i> | Kagoshima                          | Japan      | Ca2              | Wild-captured              |
| MG252              | <i>M. m. molossinus</i> | Takatsuki                          | Japan      | Ma5              | Wild-captured              |
| MG307              | <i>M. m. molossinus</i> | Wakayama                           | Japan      | Ma5              | Wild-captured              |
| MG254              | <i>M. m. molossinus</i> | Kanazawa                           | Japan      | Ma5 / Ca2        | Wild-captured              |
| MG442              | <i>M. m. molossinus</i> | Tanegashima Is.                    | Japan      | Ma5              | Wild-captured              |
| MG440              | <i>M. m. molossinus</i> | Tsushima Is.                       | Japan      | Ca2              | Wild-captured              |
| RFM/J              | <i>M. m. domesticus</i> |                                    |            | Da1              | Laboratory inbred strain   |
| C57BR/J            | <i>M. m. domesticus</i> |                                    |            | Da2              | Laboratory inbred strain   |
| SJL/J              | <i>M. m. domesticus</i> |                                    |            | Da1              | Laboratory inbred strain   |
| P/J                | <i>M. m. domesticus</i> |                                    |            | Da1              | Laboratory inbred strain   |
| BDP/J              | <i>M. m. domesticus</i> |                                    |            | Da1              | Laboratory inbred strain   |
| A/J                | <i>M. m. domesticus</i> |                                    |            | Da2              | Laboratory inbred strain   |
| 129s1/SvImJ        | <i>M. m. domesticus</i> |                                    |            | Da2              | Laboratory inbred strain   |
| LP/J               | <i>M. m. domesticus</i> |                                    |            | Da2              | Laboratory inbred strain   |
| CBA/J              | <i>M. m. domesticus</i> |                                    |            | Da1              | Laboratory inbred strain   |
| DBA2/J             | <i>M. m. domesticus</i> |                                    |            | Da2              | Laboratory inbred strain   |
| SK/CamEiJ          | <i>M. m. domesticus</i> | Skokholm Is.                       | UK         | Da1              | Laboratory inbred strain   |
| PERA/EiJ           | <i>M. m. domesticus</i> | Rimac Valley                       | Peru       | Da1              | Laboratory inbred strain   |
| WSB/EiJ            | <i>M. m. domesticus</i> | Centreville,<br>Queen Anne<br>City | USA        | Da1              | Laboratory inbred strain   |
| AVZ/Ms             |                         | Ahwaz                              | Iran       | Db5              | Wild-derived inbred strain |
| MG305              | <i>M. m. domesticus</i> | Montpellier                        | France     | Dc1              | Wild-captured              |
| MG5188             | <i>M. m. domesticus</i> | Seychelles                         | Seychelles | Da1              | Wild-captured              |
| MG301              | <i>M. m. domesticus</i> | Mauritius Is.                      | Mauritius  | Da3              | Wild-captured              |
| MG392              | <i>M. m. domesticus</i> | Dakar                              | Senegal    | Db2 /Dc2         | Wild-captured              |
| MG393              | <i>M. m. domesticus</i> | Monastir                           | Tunisia    | Dd1              | Wild-captured              |
| MG383              | <i>M. m. domesticus</i> | Oran                               | Algeria    | Db4              | Wild-captured              |
| MG378              | <i>M. m. domesticus</i> | Haifa                              | Israel     | Db1              | Wild-captured              |
| MG375              | <i>M. m. domesticus</i> | Afula                              | Israel     | Dc2              | Wild-captured              |
| MG394              | <i>M. m. domesticus</i> | Cislago                            | Italy      | Da1              | Wild-captured              |
| MG380              | <i>M. m. domesticus</i> | Minorca                            | Spain      | Da1              | Wild-captured              |

|                   |                         |                       |                  |          |                            |
|-------------------|-------------------------|-----------------------|------------------|----------|----------------------------|
| MG382             | <i>M. m. domesticus</i> | Cairo                 | Egypt            | Db3      | Wild-captured              |
| MG385             | <i>M. m. domesticus</i> | Corse                 | France           | Da4      | Wild-captured              |
| MG384             | <i>M. m. domesticus</i> | Annemasse             | France           | Da1      | Wild-captured              |
| MG430             | <i>M. m. domesticus</i> | Coppock               | Peru             | Da3      | Wild-captured              |
| MG364             | <i>M. m. domesticus</i> | Amlin                 | Canada           | Da3      | Wild-captured              |
| MG390             | <i>M. m. domesticus</i> | Azrou                 | Morocco          | Da2      | Wild-captured              |
| HS4378            | <i>M. m. domesticus</i> | Altindere             | Turkey           | Da1      | Wild-captured              |
| HS4379            | <i>M. m. domesticus</i> | Altindere             | Turkey           | Da5      | Wild-captured              |
| HS4414            | <i>M. m. domesticus</i> | Burra,<br>South Wales | New<br>Australia | Da1      | Wild-captured              |
| HS4415            | <i>M. m. domesticus</i> | Burra,<br>South Wales | New<br>Australia | Da1 /Dc2 | Wild-captured              |
| B10.CAS3/Kfl      | <i>M. m. castaneus</i>  |                       | Thailand         | Ca2      | H2 congenic strain         |
| B10.CAS4(R28)/Kfl | <i>M. m. castaneus</i>  |                       | Thailand         | Cd1      | H2 congenic strain         |
| CAST/EiJ          | <i>M. m. castaneus</i>  |                       | Thailand         | Ca2      | Wild-derived inbred strain |
| MG421             | <i>M. m. castaneus</i>  | Quezon City           | Philippines      | Cb2      | Wild-captured              |
| MG456             | <i>M. m. castaneus</i>  | Bandung               | Indonesia        | Ce3      | Wild-captured              |
| MG5059            | <i>M. m. castaneus</i>  |                       | Malaysia         | Ca2 /Da1 | Wild-captured              |
| MG501             | <i>M. m. castaneus</i>  | Guilin                | China            | Ce1      | Wild-captured              |
| MG503             | <i>M. m. castaneus</i>  | Guangzhou             | China            | Ca2 /Cb4 | Wild-captured              |
| HI303             | <i>M. m. castaneus</i>  | Bhubaneswar           | India            | Cc1 /t   | Wild-captured              |
| HI306             | <i>M. m. castaneus</i>  | Bhubaneswar           | India            | Cd2/ Ca2 | Wild-captured              |
| MG5123            | <i>M. m. castaneus</i>  | BandarLanpung         | Indonesia        | Ce2      | Wild-captured              |
| MG2111            | <i>M. m. castaneus</i>  | Sanya                 | China            | Ca2 /Cb2 | Wild-captured              |
| HI115             | <i>M. m. castaneus</i>  | Bali Denpasar         | Indonesia        | Ca2      | Wild-captured              |
| HI153             | <i>M. m. castaneus</i>  | Ujung Pandang         | Indonesia        | Cb2      | Wild-captured              |
| HI350             | <i>M. m. castaneus</i>  | Mymensingh            | Bangladesh       | Ce4      | Wild-captured              |
| HI366             | <i>M. m. castaneus</i>  | Dhaka                 | Bangladesh       | Cb5 /t   | Wild-captured              |
| HI185             | <i>M. m. castaneus</i>  | Delhi                 | India            | Ca2 /Cb1 | Wild-captured              |
| HI327             | <i>M. m. castaneus</i>  | Hyderabad             | India            | Cb1      | Wild-captured              |
| MG678             | <i>M. m. castaneus</i>  | Kunming               | China            | Da2      | Wild-captured              |
| HI276             | <i>M. m. castaneus</i>  | Mysore                | India            | Ca2 /Cd3 | Wild-captured              |
| MG5134            | <i>M. m. castaneus</i>  | NowShahr              | Iran             | Ca1 /Mb3 | Wild-captured              |
| MG5046            | <i>M. m. castaneus</i>  | Mashhad               | Iran             | Ma13     | Wild-captured              |
| HI172             | <i>M. m. castaneus</i>  | Islamabad             | Pakistan         | Cc3      | Wild-captured              |
| HI175             | <i>M. m. castaneus</i>  | Islamabad             | Pakistan         | Ca2 /Mb4 | Wild-captured              |
| HI159             | <i>M. m. castaneus</i>  | Leh                   | India            | Ce5 /Cb3 | Wild-captured              |
| HI260             | <i>M. m. castaneus</i>  | Sahiwal               | Pakistan         | Ca2 /Cb5 | Wild-captured              |

|              |                         |               |             |            |                            |
|--------------|-------------------------|---------------|-------------|------------|----------------------------|
| BRC3566      | <i>M. m. castaneus</i>  | Kabul         | Afghanistan | Da5        | Wild-captured              |
| PWD/PhJ      | <i>M. m. musculus</i>   | Kunratice     | Czech       | Ma7        | Wild-derived inbred strain |
| KJR/Ms       | <i>M. m. musculus</i>   | Kojuri        | Korea       | Ma16       | Wild-derived inbred strain |
| MG80         | <i>M. m. musculus</i>   | Beijing       | China       | Ma2 /Ma14  | Wild-captured              |
| MG686        | <i>M. m. musculus</i>   | Kashgar       | China       | Mb1/Ma2    | Wild-captured              |
| MG716        | <i>M. m. musculus</i>   | Lhasa         | China       | Ma15 /Ma2  | Wild-captured              |
| MG3025       | <i>M. m. musculus</i>   | Vladivostok   | Russia      | Da5 /Ma9   | Wild-captured              |
| MG3030       | <i>M. m. musculus</i>   | Chita Region  | Russia      | Ma15       | Wild-captured              |
| MG3045       | <i>M. m. musculus</i>   | Novosibirsk   | Russia      | Da5        | Wild-captured              |
| MG3069       | <i>M. m. musculus</i>   | Magadan       | Russia      | Cb1        | Wild-captured              |
| MG5130       | <i>M. m. musculus</i>   | Bialowieza    | Poland      | Ma17       | Wild-captured              |
| MG740        | <i>M. m. musculus</i>   | Khotan        | China       | Mb1        | Wild-captured              |
| MG867        | <i>M. m. musculus</i>   | Turpan        | China       | Ma2        | Wild-captured              |
| MG2086       | <i>M. m. musculus</i>   | Jiangyin      | China       | Ma6        | Wild-captured              |
| MG961        | <i>M. m. musculus</i>   | Laiyang       | China       | Ma10       | Wild-captured              |
| MG3010       | <i>M. m. musculus</i>   | Grozny        | Russia      | Cc4 /Ma8   | Wild-captured              |
| MG3044       | <i>M. m. musculus</i>   | Tallin        | Estonia     | Ma9        | Wild-captured              |
| MG3057       | <i>M. m. musculus</i>   | Moscow        | Russia      | Da5        | Wild-captured              |
| MG3088       | <i>M. m. musculus</i>   | Samarkand     | Uzbekistan  | Cb6 /Cc2   | Wild-captured              |
| MG3089       | <i>M. m. musculus</i>   | Samarkand     | Uzbekistan  | Ma18 /Ma19 | Wild-captured              |
| MG3090       | <i>M. m. musculus</i>   | Tashkent      | Uzbekistan  | Ma1 /Ma11  | Wild-captured              |
| MG3104       | <i>M. m. musculus?</i>  | Balkhash Lake | Kazakhstan  | Ma2 /Ma4   | Wild-captured              |
| MG3065       | <i>M. m. musculus?</i>  | Donetsk       | Ukraine     | Ca1 /Mb2   | Wild-captured              |
| MG2127       | <i>M. m. musculus?</i>  | Chongquin     | China       | Dc2 /Cb2   | Wild-captured              |
| MG810        | <i>M. m. musculus?</i>  | Tongliao      | China       | Ma3        | Wild-captured              |
| MG3091       | <i>M. m. musculus?</i>  | Termiz        | Uzbekistan  | Da2        | Wild-captured              |
| MG399        | <i>M. m. musculus?</i>  | Ljubljana     | Slovenija   | Ma7        | Wild-captured              |
| MG3054       | <i>M. m. musculus?</i>  | Poronaysk     | Russia      | Ma9 /t     | Wild-captured              |
| C3H/tw71     | <i>M. m. domesticus</i> | Jutland       | Denmark     | Da1 /t     | t-haplotype                |
| C3H/tw75     | <i>M. m. domesticus</i> | Jena          | Germany     | Da1 /t     | t-haplotype                |
| C3H/tw5      | <i>M. m. domesticus</i> | New York      | USA         | Da1 /t     | t-haplotype                |
| C3H.Ttf/t12+ | <i>M. m. domesticus</i> |               |             | Da1 /t     | t-haplotype                |
| Ttf/tw12+    | <i>M. m. domesticus</i> |               |             | Da1 /t     | t-haplotype                |
| C3H.Ttf/t0+  | <i>M. m. domesticus</i> |               |             | Da1 /t     | t-haplotype                |
| tw2/tw2      | <i>M. m. domesticus</i> |               |             | t / t      | t-haplotype                |
| SEG/Pas      | <i>M. spretus</i>       |               |             | SEG        | Neighboring species        |
| SPRET/EiJ    | <i>M. spretus</i>       | Puerto Real   | Spain       | SPRET      | Neighboring species        |
| ZBN          | <i>M. spicilegus</i>    |               | Bulgaria    | ZBN        | Inbred strain              |



(Neighboring species)

|            |                       |          |                                |                     |
|------------|-----------------------|----------|--------------------------------|---------------------|
| HS537      | <i>M. macedonicus</i> | Israel   | macedonicus1<br>/ macedonicus2 | Neighboring species |
| CAROLI/EiJ | <i>M. caroli</i>      | Thailand | caroli                         | Other species       |
| PAHARI/EiJ | <i>M. pahari</i>      | Thailand | pahari                         | Other species       |

**Supplementary Table S3. PCR primer sequence and PCR condition**

| Primer name     | Sequence                        | Annealing TEMP (°C) | Elongation time    |
|-----------------|---------------------------------|---------------------|--------------------|
| Prdm9 cDNA_F    | TTCTAGGCTCAGGCCCGACCATAGG       | 56                  | 2min               |
| Prdm9 cDNA_R    | GCTGTTGGCTTTCTCATTCTTTTCG       |                     |                    |
| Prdm9 Exon12_F  | ACAACCTTTCCAGCACACTCAAAGAAC     | 68                  | 3min (2 step)      |
| Prdm9 Exon12_R  | ATGAGAATTTGCAATGGGGCTTACTCC     |                     |                    |
| Prdm9 ZFA-L_F   | GAAAGTAAGAGAAGTGTGGAAGAGCTCAGAA | 68                  | 3min (2 step)      |
| Prdm9 ZFA-L_R   | GAGATGTGGTTTTATTGCTGTTGGCTTTCTC |                     |                    |
| Prdm9 HSR1_F    | CTGACACTCAGATTACCAAGGGAAGAACTG  | 68                  | 1min30sec (2 step) |
| Prdm9 HSR1_R    | TGCCCAGGCTACCATAAAAGCTTAAGAGATC |                     |                    |
| Tcp1 Exon8-12_F | GACATCACCCCAGCAGACAGCTTTCAC     | 65                  | 2min               |
| Tcp1 Exon8-12_R | GGCCTCTGTTGCGAACTTCAGGCTCTTC    |                     |                    |

**Supplementary Table S4. Sequencing primer sequence**

| Primer name   | Sequence                     |
|---------------|------------------------------|
| M13 (-20)     | GTAAAACGACGGCCAG             |
| M13_R (-47)   | CGCCAGGGTTTTCCAGTCACGAC      |
| M13_R         | CAGGAAACAGCTATGAC            |
| cDNA-Seq_338  | GGGTGAAGCACAGTAAACAGC        |
| cDNA-Seq_836  | CCTATGAGGGTCAGATCACAGAG      |
| cDNA-Seq_1143 | CACAGCAGGAAGAGAACTAAGGA      |
| cDNA-Seq_1450 | CAGGCCAGACAACAAATACAGAG      |
| ZFA_R         | GCTGTTGGCTTTCTCATTCTTTTCG    |
| Tcp1_SF       | CAAGATAGAAGGTGCAAGGGTTGTGT   |
| Tcp1_SM1      | TTCTGGAGGTACGTCCTCTCCTGG     |
| Tcp1_SM2      | GTGGTCCCAGGTGGAGGTGCTGTAGAAG |
| Tcp1_SM3      | GTTCCCGAGATCCCTAAGGAAGAAAC   |
| Tcp1_SR       | CAGCCTCTGTTGCGAACTTCAGGCTCTT |
